# Supplementary material
Source: publisher figshare collection journal article supplement (https://karger.figshare.com/ndownloader/files/21887049)
Supplement: Supplementary file 1 [file 21887049]

| **Circuits (n=291)** | **CVVH-Heparin**  **> 625 Ui/h** | **CVVH-Heparin**  **< 625 Ui/h** | **P values** |
| --- | --- | --- | --- |
| **Renal replacement therapy characteristics** |  |  |  |
| Total number - no. (%) | **73 (10.6)** | **218 (31.6)** | **-** |
| Median filter lifespan - (IQR) - hours | 20.9 (35.4) | 14.2 (19.2) | <0.01 |
| Median dose delivered - (IQR) - ml/kg | 0.6 (1.0) | 0.5 (0.5) | 0.098 |
| Median time between ICU admission and Therapy initiation - (IQR) - hours | 38.8 (80.1) | 38.8 (57.7) | 0.167 |
| **Reason for therapy interruption** |  |  |  |
| Filter clotting - no. (%) | 22 (34.4) | 91 (46.4) | 0.110 |
| End of therapy - no. (%) | 16 (25.0) | 48 (24.5) | 0.999 |
| Time limit of 72h reached - no. (%) | 8 (12.5) | 14 (7.1) | 0.198 |
| Elevation of transmembrane pressure - no. (%) | 18 (28.1) | 43 (21.9) | 0.312 |
| Missing Data – no. (%) | 9 12.3) | 22 (10.1) | - |
|  |  |  |  |

**Table 2.** **CRRT Circuit parameters and reasons for interruption comparison between CVVH-Heparin according to amount of heparin administered.**

CVVH: continuous veno-venous hemofiltration
